# Supplementary material
Source: ML conference proceedings conference paper supplement (https://openreview.net/forum?id=IXM8eL4KvE)
Supplement: supplementary_material [file attachment]

# Supplementary Materials

Anonymous Authors

## 1 THE IMPACT OF INITIALIZING THE NUMBER OF KEYWORDS.

### 1.1 TaPA model

Figures 1a and 1b in the appendix show the changes in ASR and Epoch Cost of the Llama-2-chat model under different numbers of keyword initialization conditions respectively. Figures 1c and 1d in the appendix show the changes in loss values of the Llama-2-chat model under different numbers of keyword initialization conditions respectively.

### 1.2 Llama-2-chat model

Figures 2a and 2b in the appendix show the changes in ASR and Epoch Cost of the Llama-2-chat model under different numbers of keyword initialization conditions respectively. Figures 2c and 2d in the appendix show the changes in loss values of the Llama-2-chat model under different numbers of keyword initialization conditions respectively.

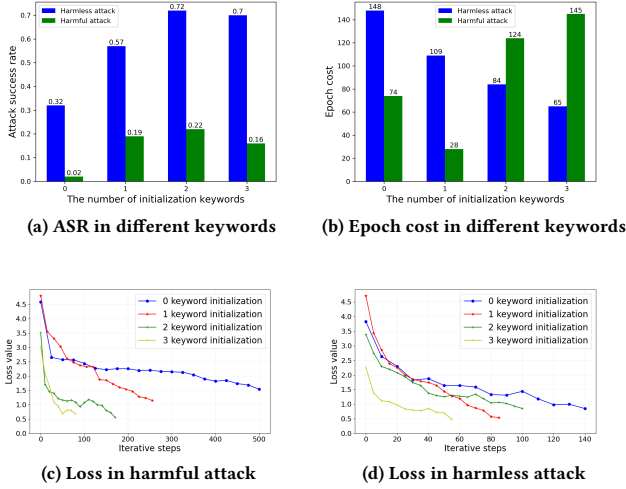

Figure 1: The impact of initializing the number of keywords in TaPA model.

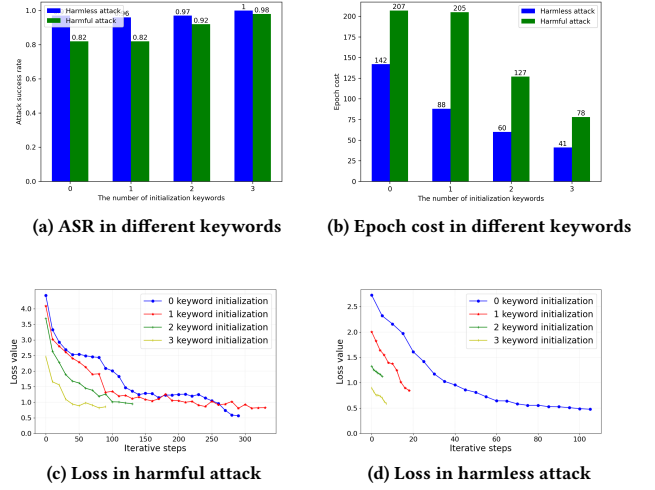

Figure 2: The impact of initializing the number of keywords in Llama-2-chat model.
